# Supplementary material
Source: PubMed Central journal article supplement (PMC7293542)
Supplement: NIHMS1590966-supplement-1.pdf [file NIHMS1590966-supplement-1.pdf]

Supplement Figure 1

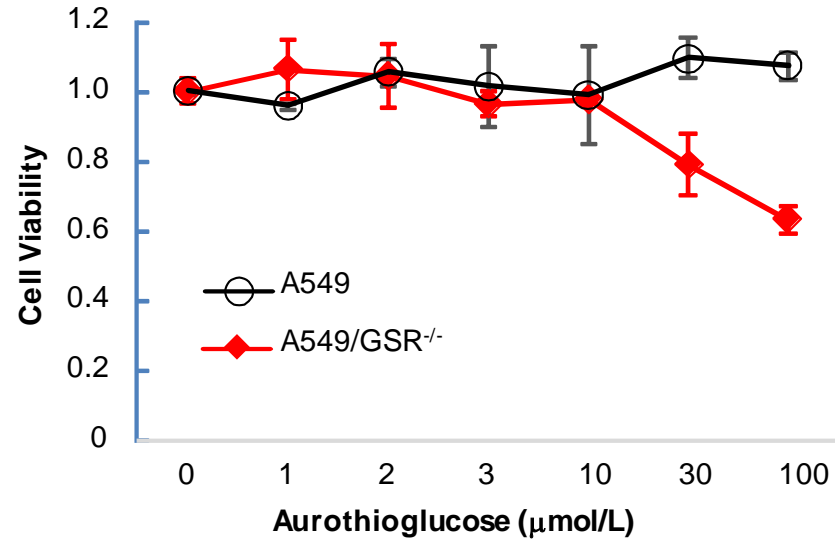

Dose-response curves of aurothioglucose in A549 and A549/GSR<sup>-/-</sup>. Data are presented as the mean  $\pm$  standard deviation (SD) of a triplet assay. Cells treated with DMSO alone were used as controls, and their values were set as 1. Aurothioglucose induces cell viability loss at concentration of  $\geq 30$   $\mu\text{mol/L}$  in A549/GSR<sup>-/-</sup> cells but not in A549 cells.

## Supplement Figure 2

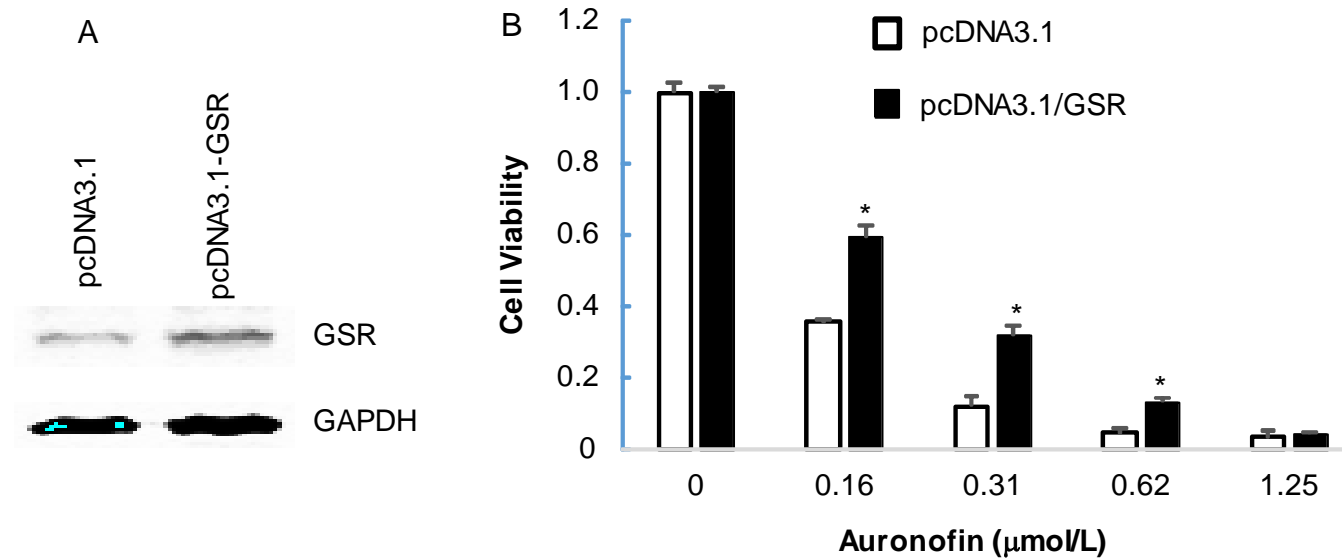

H1993 cells were transfected with either pcDNA3.1 or pcDNA3.1/GSR using lipofectamine 2000 and were briefly selected with G418 (200  $\mu\text{g/ml}$ ) for one week before used for Western blot analysis. A) Western blot analysis for GSR expression, GAPDH was used as a loading control. B) Dose-response auranofin in H1993/vector and H1993/GSR. Data are presented as the mean + standard deviation (SD) of a triplet assay at 72 h after the treatment. Cells treated with DMSO alone were used as controls, and their values were set as 1. Transfection of the GSR gene in H1993 cells resulted in increased viable cells at auranofin doses of 0.16 – 0.62  $\mu\text{mol/L}$  \* indicates  $P < 0.05$
